# Supplementary material for: Operando micro-spectroscopy on ZSM-5 containing extrudates during the oligomerization of 1-hexene
Source: Royal Society of Chemistry journal article supplement (doi:10.1039/c7cy02460f), 2018-01-01
Supplement: c7cy02460f1.pdf [file c7cy02460f1.pdf]

Supporting information

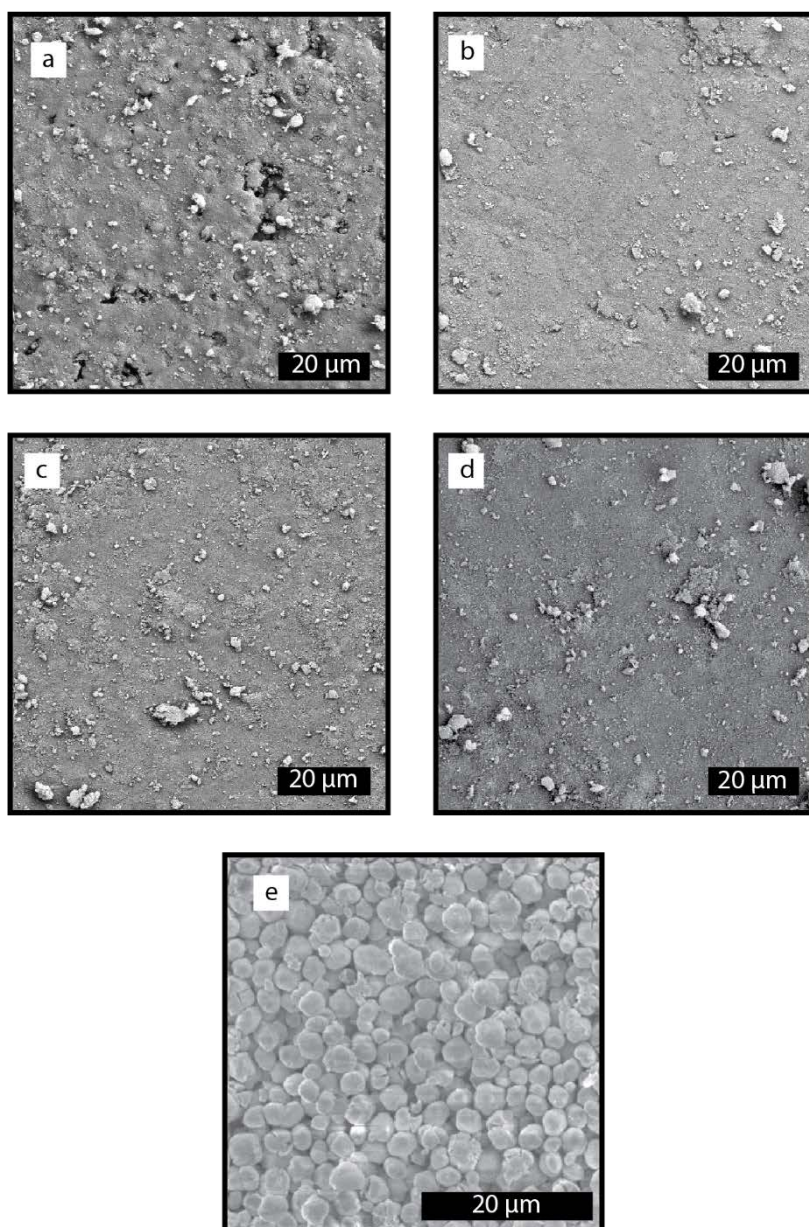

Figure S1. Scanning Electron Microscopy (SEM) image of the surface of (a) 20:80  $\text{Al}_2\text{O}_3$ , (b) 20:80  $\text{SiO}_2$ , (c)  $\text{Al}_2\text{O}_3$ , (d)  $\text{SiO}_2$  and (e) ZSM-5.

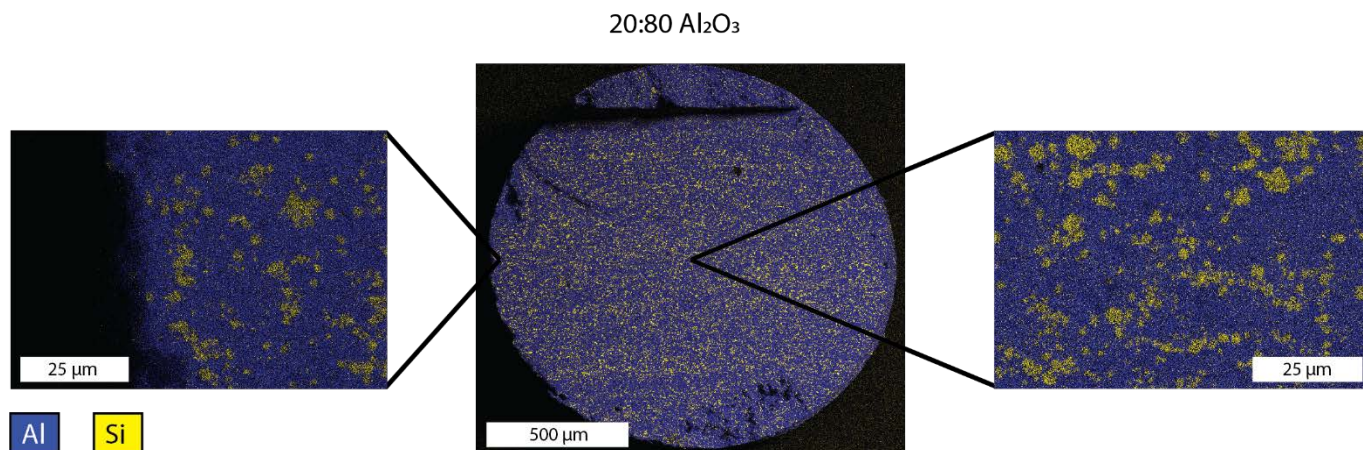

Figure S2. SEM-EDX map of a cross section of 20:80 Al<sub>2</sub>O<sub>3</sub> surface. The SEM-EDX map shows that the ZSM-5 crystals are equally distributed throughout the extrudate. In this map, Si is colored yellow and Al is colored blue.

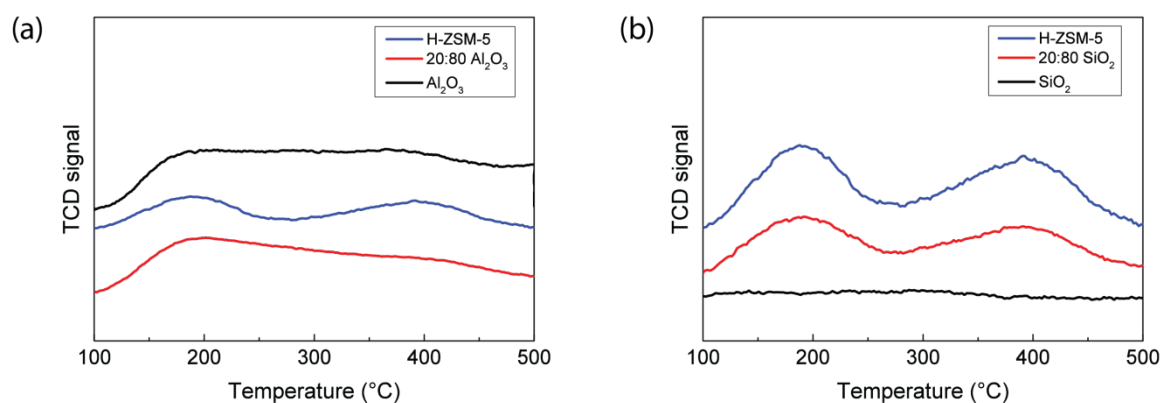

Figure S3. NH<sub>3</sub> TPD profiles of the different samples with (a) Al<sub>2</sub>O<sub>3</sub> binder and (b) SiO<sub>2</sub> binder.

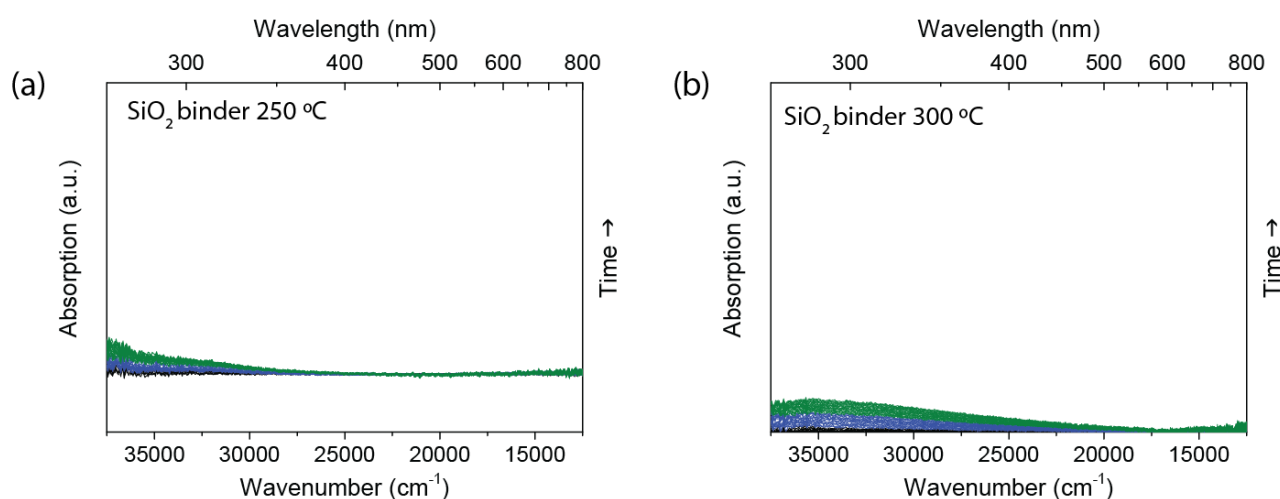

Figure S4. Time-resolved *operando* UV-vis diffuse reflectance spectra during the oligomerization reaction with 1-hexene over SiO<sub>2</sub> binder at (a) 250 °C and (b) 300 °C for 1 h. The black spectra are taken the first 5 min, for the next 25 min the spectra are shown in blue and the last 30 min are green.

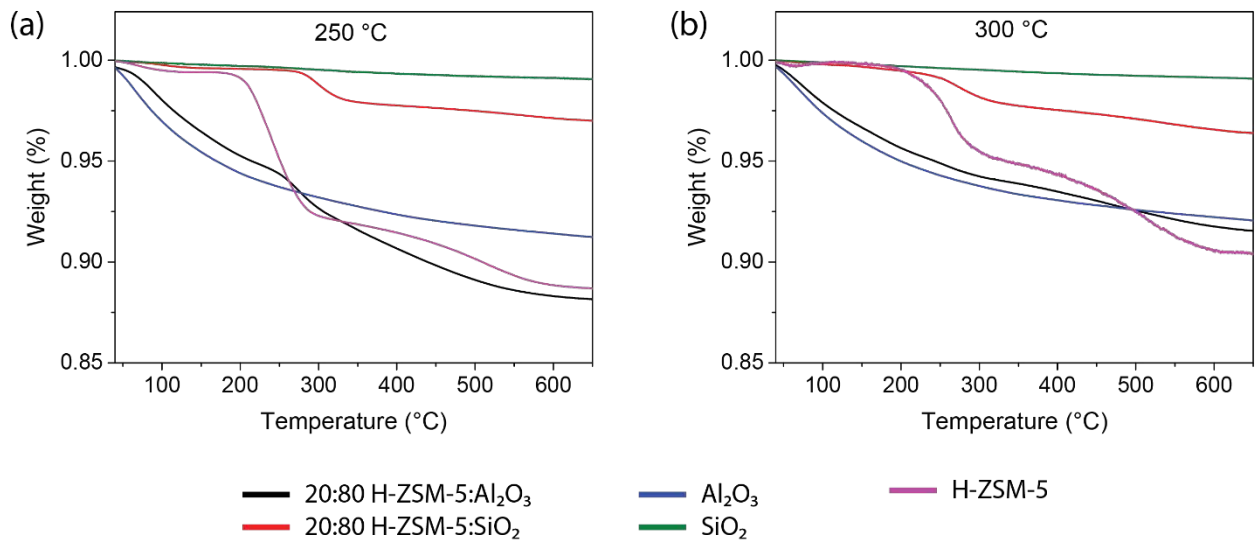

Figure S5. TGA measurements of the different extrudates showing the weight loss for reaction at (a) 250 °C and (b) 300 °C. The weight percent in Table 1 shows the weight loss between 100 °C – 700 °C.

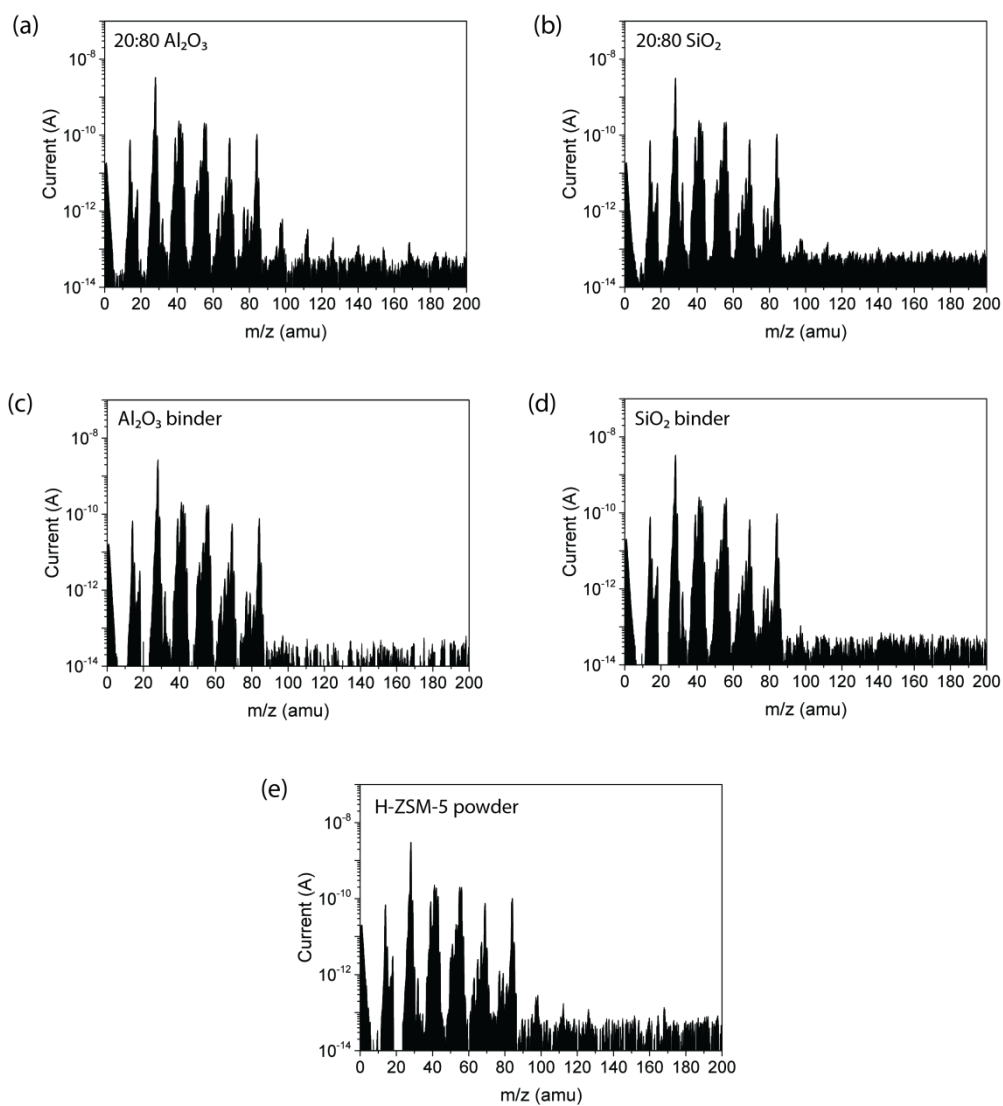

Figure S6. Mass spectra taken after 10 min of 1-hexene oligomerization reaction at 250 °C of (a) 20:80  $\text{Al}_2\text{O}_3$ , (b) 20:80  $\text{SiO}_2$ , (c)  $\text{Al}_2\text{O}_3$  binder, (d)  $\text{SiO}_2$  binder and (e) H-ZSM-5 powder.

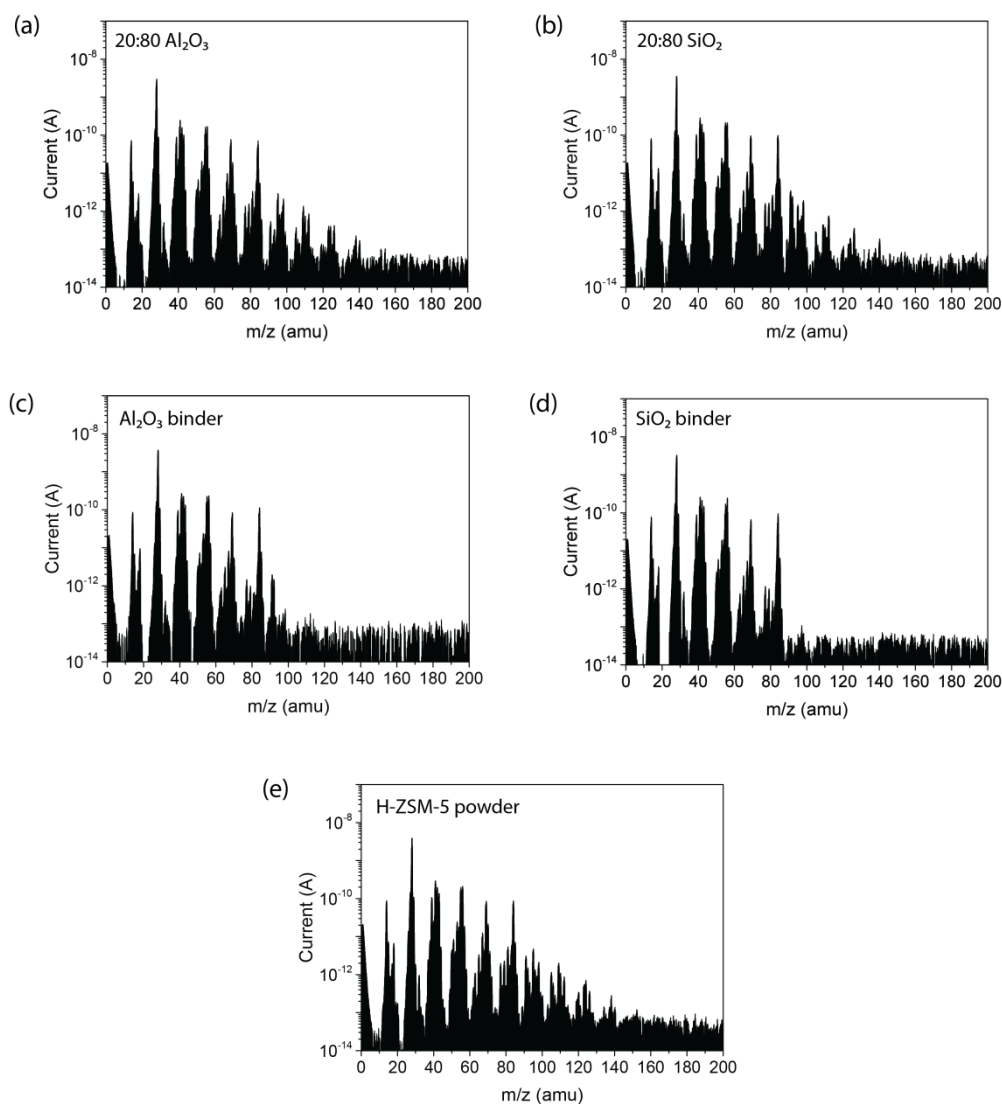

Figure S7. Mass spectra taken after 10 min of 1-hexene oligomerization reaction at 300 °C of (a) 20:80  $\text{Al}_2\text{O}_3$ , (b) 20:80  $\text{SiO}_2$ , (c)  $\text{Al}_2\text{O}_3$  binder, (d)  $\text{SiO}_2$  binder and (e) H-ZSM-5 powder.

Video S1. *In-situ* 2-D confocal fluorescence microscopy movies taken during 1 h of 1-hexene oligomerization at 300 °C of 20:80  $\text{SiO}_2$ . Excitation with 404 nm, 488 nm, 562 nm and 642 nm laser causes respectively the blue, green and red (both 562 and 642 nm laser) fluorescence.

Video S2. *In-situ* 2-D confocal fluorescence microscopy movies taken during 1 h of 1-hexene oligomerization at 300 °C of 20:80  $\text{Al}_2\text{O}_3$ . Excitation with 404 nm, 488 nm, 562 nm and 642 nm laser causes respectively the blue, green and red (both 562 and 642 nm laser) fluorescence.
